1 **The Role of Low Molecular Weight Fungal Metabolites in Grapevine Trunk**  
2 **Disease Pathogenesis: Eutypa Dieback and Esca**

3  
4 **Gabriel Perez-Gonzalez<sup>1</sup>, Dana Sebestyen<sup>1</sup>, Elsa Petit<sup>2</sup>, Jody Jellison<sup>3</sup> Laura Mugnai<sup>4</sup>, Eric**  
5 **Gelhay<sup>5</sup>, Norman Lee<sup>6</sup>, Sibylle Farine<sup>7</sup>, Christophe Bertsch<sup>7</sup>, Barry Goodell<sup>1\*</sup>**  
6

7 <sup>1</sup>Department of Microbiology, University of Massachusetts, Amherst, MA 01003, U.S.A

8 <sup>2</sup> Stockbridge School of Agriculture, University of Massachusetts, Amherst, MA 01003, U.S.A

9 <sup>3</sup> Center for Agriculture, Food and the Environment, University of Massachusetts, Amherst, MA  
10 01003 U.S.A.

11 <sup>4</sup>Department of Agricultural, Food, Environmental and Forestry Science and Technology,  
12 University of Florence, Firenze 50144, Italy

13 <sup>5</sup>Université de Lorraine, INRAE, Interactions Arbres-Microorganismes, F-54000 Nancy, France

14 <sup>6</sup>Chemical Instrumentation Center (CIC), Boston University, Boston, MA 02215, U.S.A

15 <sup>7</sup>Laboratoire Vigne Biotechnologies et Environnement EA-3991. Université de Haute-Alsace,  
16 Colmar 68008, France

17

18 \*Corresponding author: Barry Goodell; Email: [bgoodell@umass.edu](mailto:bgoodell@umass.edu)

19

20 **ABSTRACT** *Eutypa dieback* and *Esca* are serious grapevine trunk diseases (GTDs) caused by fungal  
21 consortia causing large economic losses in vineyards. Depending on the disease the species  
22 involved include *Eutypa lata*, *Phaeoacremonium minimum*, and *Phaeomoniella chlamydospora*.  
23 There is a need to understand the complex pathogenesis mechanisms used by these causative  
24 fungi to develop treatments for the diseases they cause. Low molecular weight metabolites  
25 (LMW) are known to be involved in non-enzymatic oxygen radical generation in fungal  
26 degradation of wood by some Basidiomycota species, and as part of our work to explore the basis  
27 for fungal consortia pathogenesis, LMW metabolite involvement by the causal GTD fungi was  
28 explored. The GTD fungal pathogens examined, *Eutypa lata*, *Phaeoacremonium minimum* and  
29 *Phaeomoniella chlamydospora*, were found to produce low molecular weight iron binding  
30 metabolites that preferentially reduced iron or redox cycled to produce hydrogen peroxide.  
31 Uniquely, different LMW metabolites isolated from the GTD fungi promoted distinct chemistries

32 that are important in a type of non-enzymatic catalysis known as chelator-mediated Fenton  
33 (CMF) reactions. CMF chemistry promoted by LMW metabolites from these fungi allowed for the  
34 generation of highly reactive hydroxyl radicals under conditions promoted by the fungi. We  
35 hypothesize that this new reported mechanism may help to explain the necrosis of woody  
36 grapevine tissue as a causal mechanism important in pathogenesis in these two grapevine trunk  
37 diseases.

38

39 **IMPORTANCE** Understanding the pathogenesis of grape trunk diseases (GTDs) is the key to the  
40 development of disease control and treatment. While fungal extracellular enzyme systems are  
41 typically cited relative to their fungal mechanisms in pathogenesis, non-enzymatic mechanisms  
42 have been less studied in this regard and the role of low molecular weight (LMW) fungal  
43 metabolites in GTD development is quite limited. In this article, we demonstrate that GTD-  
44 causative fungal pathogens *Eutypa lata*, *Phaeoacremonium minimum* and *Phaeomoniella*  
45 *chlamydospora* produce LMW phenolic metabolites under iron-restricted conditions. These  
46 metabolites undergo a series of redox reactions, with different fungi producing metabolites that  
47 preferentially either reduce iron, or generate hydrogen peroxide, under conditions simulating  
48 grapevine woody tissue. These conditions have the potential to promote generation of highly  
49 damaging hydroxyl radicals through a mechanism that appears to be similar to non-enzymatic  
50 chelator-mediated Fenton (CMF) chemistry which is involved in fungal degradation of wood by  
51 non-related fungal orders. This is the first report of CMF chemistry promoted by GTD-causative  
52 fungi under laboratory conditions and the research suggests an alternate pathway that may  
53 contribute to pathogenesis in GTDs, and a potential target for vine protection.

54

55 **KEYWORDS** Grapevine trunk disease (GTD), Chelator-mediated Fenton chemistry (CMF),  
56 hydroxyl radicals, wood degradation, wood pathogens, low molecular weight metabolites (LMW)

57

## 58 **INTRODUCTION**

59

60 Grapevine trunk diseases (GTDs) are caused by a complex of fungi that were described as early  
61 as the end of the 20th century. Most GTD fungi attack the perennial tissues of the grapevine and  
62 ultimately lead to the death of the plant (1-3) and are characterized by the dieback and  
63 necrosis/decay of the stem tissue. Some of these diseases can show foliar symptoms that may  
64 not appear until deterioration of the stem wood is advanced (4). Although *Eutypa* dieback has  
65 been reported to be caused solely by *Eutypa lata* or other *Eutypa* species, current literature  
66 suggests that these pathogens are also associated with other GTDs. Further, *Eutypa* spp. is often  
67 associated with a consortium of other fungi, especially the Diaporthales order, with  
68 *Phaeoacremonium minimum* (Pmin) and *Phaeomoniella chlamydospora* (Pch) predominating (5-  
69 8). *Eutypa* dieback, Esca, and *Botryosphaeria* dieback are the most significant GTDs involving one  
70 or several xylem-inhabiting fungi, with Pch and Pmin typically found in consortia for Esca disease  
71 development (3, 9).

72

73 Most GTD fungal pathogens enter grapevine trunk wood in vineyards through pruning wounds,  
74 inhabiting the xylem cells in the woody tissue and causing, with time, significant necrosis and  
75 decay, ultimately leading in some of those diseases to foliar symptoms and cordon and vine death  
76 (4). In *Eutypa* dieback, as the disease progresses complete loss of yield, stunting of shoots, and/or

77 loss of cordons and vines occurs, with older vineyards experiencing as much as 30% necrosis of  
78 cordons or vines. In the USA, *Eutypa* dieback and *Botryosphaeria* dieback predominate in  
79 California and have also been an emerging issue for cold-climate vineyards in the Northeastern  
80 US and in British Columbia, Canada. In California alone, losses by GTDs each year amount to 14%  
81 of the value of the wine grapes produced with economic loss of more than \$260 million per year  
82 (10, 11). GTDs also cause up to 2 billion in losses to vineyards globally each year (12).

83

84 While the pathogenic mechanisms and foliar damage in *Eutypa* dieback has been reported to be  
85 associated with the production of eutypine and other phytotoxic compounds (13), the  
86 mechanisms involved in producing woody tissue necrosis and other symptoms associated with  
87 both *Eutypa* dieback and Esca are still not well understood. Importantly, it is also unknown why  
88 a consortium of fungi is typically involved in both diseases (13, 14).

89

90 Wood decay by brown rot Basidiomycota species is similar in some respects to the necrosis in  
91 grapevine wood caused by Ascomycota GTD fungi. Decay initiated by brown rot fungi produces  
92 a type of wood degradation where both holocellulose and lignin are depolymerized by a highly  
93 oxidative non-enzymatic chelator mediated Fenton (CMF) mechanism (15-21). After, or  
94 concurrent with CMF action, the polysaccharide component of the wood cells is then  
95 preferentially extracted from the wood via the action of fungal extracellular carbohydrate active  
96 enzymes (CAZymes), while the lignin component is repolymerized within the wood cell wall (19,  
97 22). In *E. lata*-infected grape wood, structural glucose and xylose from the hemicellulose are also  
98 preferentially degraded and depleted from the wood while lignin is degraded much more slowly

99 (23) similarly to brown rot wood decay. The residual lignin in both brown rotted wood and in  
100 necrotic wood attacked by GTD fungi is brown in coloration because of the residual or modified  
101 lignin which remains. Because of the similarities to brown-rot wood decay, and prior reports on  
102 the action of oxygen radical generation in Esca disease (24) , we considered that a mechanism  
103 similar to CMF chemistry might potentially play a role in GTD fungal attack of grapevine wood.  
104 The hallmark of the CMF system is the production of fungal low molecular weight (LMW)  
105 compounds that promote the mediated Fenton reaction (eq. 1) by the reduction of Fe<sup>3+</sup> to Fe<sup>2+</sup>  
106 with the wood cell wall, and away from the fungal hyphae (15, 19). This CMF chemistry is  
107 promoted by a reduction in pH of the fungal micro-environment (typically to pH 5.5 or lower).  
108 Brown rot fungi generally reduce the pH of their micro-environments to approximately pH 4 or  
109 lower, and this is thought to aid in promoting a sequence of reactions leading up to the Fenton  
110 reaction occurring within the wood cell wall (19, 25, 26). In the low pH environment of the brown  
111 rot fungal extracellular matrix (ECM) which immediately surrounds the fungal hyphae, the pH is  
112 lower than pH 4.0 and iron will be sequestered (19). However, within the wood cell wall the pH  
113 is maintained at approximately 5.5, and at that pH LMW compounds will redox cycle with iron to  
114 generate Fe<sup>2+</sup> and also generate H<sub>2</sub>O<sub>2</sub> (27, 28). Both of these reactants are required for the  
115 generation of hydroxyl radicals (HO<sup>•</sup>), which are required to be generated within the cell wall for  
116 oxidative depolymerization of both cellulose and lignin to occur. This action then leads to further  
117 cell wall deconstruction by fungal CAZymes (22, 29).

118

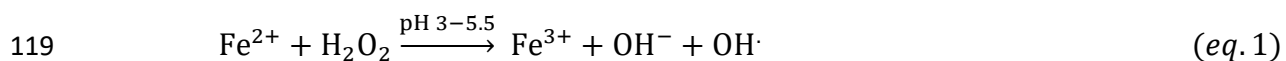

120

121 Osti and DiMarco reported that fungal supernatants of Pch and Pmin contained phenolate  
122 siderophore-like compounds, and their analysis suggested that catecholate compounds from the  
123 fungal supernatants were present that could also reduce iron, generate hydroxyl radicals (HO<sup>•</sup>)  
124 and depolymerize cellulose (24). However, their supernatants also contained high molecular  
125 weight components such as extracellular enzymes which could have skewed some of their  
126 results. Therefore, in our research we assessed only the ultrafiltered <5kDa fraction of LMW  
127 metabolites. We did not assess for siderophore receptor sites on the fungal membranes as  
128 examination of classic siderophore function was not part of our objectives for this research.  
129 *Eutypa lata* (Elata) and other fungal species involved in GTDs are known to produce acetylenic  
130 phenols and heterocyclic analogues similar to some types of siderophores (30, 31), and several  
131 LMW phenolic metabolites have been identified from Pmin and Pch (32). But it has not been  
132 reported whether these compounds have the ability to redox cycle or reduce iron as has been  
133 observed with some types of catecholate compounds produced by brown rot decay fungi, such  
134 as 2,5-dimethoxyhydroquinone (2,5-dimethoxybenzoquinone) (15).

135

136 Our research examines the nature of LMW compounds produced by Elata, Pmin and Pch, and by  
137 combinations of these three fungi, specifically for iron reduction and hydroxyl radical generation  
138 to determine if there is a link between the LMW metabolites produced and non-enzymatic  
139 chemistries that may produce hydroxyl radicals in a manner similar to that which has been  
140 demonstrated in CMF chemistry with other wood degrading fungi. We hypothesize that  
141 chemistries similar to the CMF mechanism, and enhanced by LMW metabolites produced by

142 these fungi, could potentially play a key role in the initial stages of Eutypa dieback and Esca  
143 disease, particularly associated with wood grapevine tissue necrosis.

144

## 145 **MATERIALS AND METHODS**

146

147 The three fungi involved in the Eutypa dieback consortia used in our current work were  
148 *Phaeomoniella chlamydospora* (Pch, isolate UCD7872), *Phaeoacremonium minimum* (Pmin,  
149 isolate UCD7770), and *Eutypa lata* (Elata, isolate UCD7746); all isolated from vineyards in Lodi,  
150 California. These fungi were grown both in single culture and in combination (Elata\_Pch;  
151 Elata\_Pmin; Pmin\_Pch) for six-weeks in low-iron media. LMW iron-binding metabolite  
152 production was assessed, as was hydroxyl radical generation. All analysis were done in triplicate  
153 unless otherwise stated.

154

155 **Culture media.** Iron-free cultures with restricted nutrient media were used to promote  
156 biosynthesis of iron-binding LMW compounds (33), with all glassware acid washed in 10% HCl for  
157 24 hours, rinsed with deionized distilled water (ddH<sub>2</sub>O - 18.2MΩ.cm) followed by a 90mM EDTA  
158 wash, and then rinsed 3 times with ddH<sub>2</sub>O. Restricted nutrient, iron-free media was prepared  
159 modified from (34) as follows: 1L of ddH<sub>2</sub>O mixed with 2g ammonium nitrate (Sigma-Aldrich, MO,  
160 USA), 2g monobasic potassium phosphate (Merck, MA, USA), 0.5g magnesium sulphate  
161 heptahydrate (Sigma-Aldrich, MO, USA), 0.1g calcium chloride (Bio Basics Canada Inc, ON,  
162 Canada), 0.57mg boric acid (Sigma-Aldrich, MO, USA), 0.31mg zinc sulphate heptahydrate  
163 (HIMEDIA labs, PA, USA), 0.039mg copper sulphate pentahydrate (Acros Organic, Belgium),

164 0.036mg manganese chloride tetrahydrate (Fisher Chemical), 0.018mg ammonium molybdate  
165 tetrahydrate (Acros Organic, Belgium), and 0.001g thiamine HCl (Acros Organic, Belgium). For  
166 carbon sources, glucose (Alpha Biosciences) 0.5% (w/v) and 50µm microcrystalline cellulose  
167 (Acros Organics, Belgium) 1% (w/v) were used with five replicates for each culture and in each  
168 medium. The media solution (200ml per 0.5L flask) was brought to a pH of 5.5 using NaOH and  
169 autoclaved for 30 minutes. Liquid cultures were inoculated using mycelial slurries prepared by  
170 scraping mycelium from fully grown agar plates into 50mL of sterile ddH<sub>2</sub>O. One mL of mycelial  
171 slurry was carefully pipetted onto the surface of the liquid media in each flask and allowed to  
172 grow for six weeks to promote production of LMW metabolites.

173

174 **LMW metabolite extraction.** After incubation, inoculated liquid cultures were coarsely filtered  
175 with Whatman #4 cellulose filters to remove the mycelium and cellulose microcrystals from the  
176 liquid cultures, and this filtrate was then serially filtered through a 0.22µm cellulose filter under  
177 vacuum. This was then followed by ultrafiltration through a 5kDa polyethersulfone filter used  
178 with an Amicon Stirred Cell filtration unit (EMD Millipore, MA, USA) to yield the <5kDa LMW  
179 metabolite fraction. A Bradford assay was conducted to confirm that proteins were not present  
180 (results not shown). The LMW metabolite fraction was acidified to pH 3 with HCl prior to a triple  
181 ethyl acetate (1:1 with ultrafiltered media) extraction for phenolics (33). The organic fraction was  
182 dried under reduced pressure, resuspended in methanol, and filtered through a 0.22µm filter to  
183 yield the final <5kDa LMW extract.

184



185 **Determination of total phenols by the Folin-Ciocalteu assay.** Folin-Ciocalteu (F-C) reagent  
186 was used to spectrophotometrically quantify (765nm) the amount of total phenols in solution  
187 (35) with gallic acid used as the standard. Samples of purified extract (20 $\mu$ l) and the F-C reagent  
188 (100 $\mu$ l) were reacted (5min @RT) before the addition of 20% sodium carbonate (300 $\mu$ l) to initiate  
189 the F-C reaction. After a further reaction period (2h @RT) in the dark, absorbance values were  
190 compared to the gallic acid standard for phenolic concentration determination.

191

192 **Determination of iron reduction by Ferrozine assay.** The Ferrozine assay is a colorimetric  
193 assay that is sensitive specifically to the ferrous form of iron and it is therefore useful in  
194 measuring iron reduction capacity (36). Each reaction cuvette contained at their final  
195 concentration: acetate buffer (0.100mM, pH 5.5), Ferrozine (0.250mM), Fe<sup>3+</sup> (0.030mM).  
196 Phenolics in the fungal extract (15mM according to F-C assay) was added last to start the reaction.  
197 Ferrous chloride (FeCl<sub>2</sub>) was used for the standard. Samples were mixed thoroughly into each  
198 cuvette and the reaction followed spectrophotometrically (562nm) at 5 min intervals for 45min.  
199 The ferric iron reductive capacity of all LMW extracts was normalized per nmol of phenolics  
200 added to the reaction and reported as the amount of iron reduced (mol)/amount of phenolic  
201 (mol) in the extracts assayed.

202

203 **FOX assay for H<sub>2</sub>O<sub>2</sub> detection.** A ferrous ammonium – xylenol orange (FOX) assay (37) was used  
204 to measure H<sub>2</sub>O<sub>2</sub> evolution which occurs during the oxidation of ferrous iron in Fenton chemistry.  
205 The oxidized iron reacts with xylenol orange (XO) to form a blue purple complex that can be  
206 detected at 560nm (37, 38). MES buffer (50mM, 5.5pH) and phenolics in fungal extracts (15mM

207 according to F-C assay) were added to 100 $\mu$ L of the FOX reagent (a 1:1 ratio of the XO/Ferrous  
208 ammonium sulfate mixture and sorbitol) to yield a solution of 0.100mM XO, 0.250mM ferrous  
209 ammonium sulfate, 25mM H<sub>2</sub>SO<sub>4</sub>, and 100mM sorbitol, which was incubated (RT, 30min) before  
210 centrifugation (10,000RPM, 5min) to remove any precipitate. (Sorbitol was added consistently to  
211 all samples to increase the yield of ferric iron). All samples were maintained in low light conditions  
212 to reduce UV interference, analyzed at 560nm for H<sub>2</sub>O<sub>2</sub> detection and reported as the amount of  
213 H<sub>2</sub>O<sub>2</sub> generated (mmol)/amount of phenolic (mol) in the extracts assayed.

214

215 **Electron paramagnetic resonance (EPR) for detection of hydroxyl radicals.** Methanol was  
216 evaporated from each sample using a SpinVac (35 $^{\circ}$ C, 45min) after adding the fungal extract into  
217 the reaction solvent at two pH values: (i) sodium acetate/acetic acid buffer (80mM, pH 5.5) and  
218 (ii) acidified water (adjusted to pH 3.5 with HNO<sub>3</sub>). For hydroxyl radical detection in EPR, the  
219 following components (final concentration) were used in the reaction mixture: DMPO spin-trap  
220 (5,5-dimethyl-1-pyrroline-n-oxide, 10mM) was added to the other reaction components: H<sub>2</sub>O<sub>2</sub>  
221 (0.15mM), phenolics in the fungal extract (50mM adjusted per the F-C assay). Fe<sup>3+</sup> (0.15mM) was  
222 added to start the reaction, and after incubation (5 min, @RT) the samples were transferred to a  
223 50 $\mu$ L EPR capillary glass tube. Catechol (50mM) was used as reference compound. Analysis was  
224 conducted in the X-band frequency (9.8 GHz) using a Bruker Elexsys-500 EPR instrument  
225 equipped with a super high QE cavity (ER4122SHQE-W1).

226

227 **High performance liquid chromatography (HPLC).** LMW extracts were analyzed using a  
228 Shimadzu HPLC system with an analytical C18 Nucleosil column (250mm x 4.6mm x 5 $\mu$ m,

229 0.50mL/min). Flow-through UV analysis (280nm) was conducted using an acetonitrile (ACN)  
230 linear gradient (10-90%) over 45min. The gradient was then held at 90% for 5min and the gradient  
231 reversed over the next 5 min before ending at 10% ACN over a total 60min. Fractions were then  
232 scanned (190 – 370 nm) to detect potential phenolic compounds at ~280nm absorption.

233

234 **Identification of metabolites by ultra-performance liquid chromatography – mass spectroscopy**  
235 **(UPLC-MS).** Fungal extracts were analyzed using an UPLC (ACQUITY HSS T3 (100×2.1mm×1.8µm)  
236 with Ultimate 3000 LC) combined with a Q Exactive MS (Thermo) and screened with electrospray  
237 ionization MS (ESI-MS). The mobile phase was: solvent A (0.05% formic acid water), and solvent  
238 B (acetonitrile) with a gradient elution (0-1.0min, 5%B; 1.0-12.0min, 5%-95%B; 12.0-13.5min,  
239 95%B; 13.5-13.6min, 95%-5%B; 13.6-16.0min, 5%B). The flow rate of the mobile phase was  
240 0.3mL·min<sup>-1</sup> with the column temperature (40°C), and the sample manager (4°C), both constant.

241 Mass spectrometry parameters in ESI+ and ESI- mode were:

242 ESI+ : Heater Temp 300 °C; Sheath Gas Flow rate, 45arb; Aux Gas Flow Rate, 15arb; Sweep Gas  
243 Flow Rate, 1arb; spray voltage, 3.0KV; Capillary Temp, 350 °C; S-Lens RF Level, 30%.

244 ESI- : Heater Temp 300 °C, Sheath Gas Flow rate, 45arb; Aux Gas Flow Rate, 15arb; Sweep Gas  
245 Flow Rate, 1arb; spray voltage, 3.2KV; Capillary Temp, 350 °C; S-Lens RF Level, 60%.

246 Raw data was analyzed using Compound Discoverer<sup>TM</sup> (ThermoFisher Scientific) a high-resolution  
247 accurate-mass data software for metabolite identification, and a comprehensive review was

248 conducted for each of the main compounds found in the extract selected by peak area or peak  
249 height.

250

## 251 **RESULTS AND DISCUSSION**

252

253 Cultures where two fungi were grown in consortia in some instances maintained a cultural  
254 appearance that was characteristic of one of the species, and this always occurred when Pmin  
255 was part of the consortia. With the Elata\_Pch consortia growth, discrete colonies of both species  
256 were apparent in about half the cultures whereas in the other half, Elata growth predominated.  
257 However, when comparing the metabolomic profile of the individual cultures to the consortia  
258 growth, unique extract profiles were observed in the consortia cultures as detailed below and in  
259 Fig. S1.

260

261 **Production of phenolics and iron reduction capacity.** Preliminary chromatographic screening of  
262 all fungal extracts by HPLC showed that putative phenolic compounds absorbing in the 280 nm  
263 region were present (Fig. 1). All extracts contained a maximum of five detectable peaks absorbing  
264 in the 280 nm range. Fig. 1 shows only the two most prominent phenolic peaks for extracts from  
265 the three fungi.

266

267 The Folin-Ciocalteu (F-C) assay for phenolics in individual ~280nm UV fractions showed that Pch  
268 extracts contained the largest amount of phenolics when compared to either the Elata or Pmin  
269 individual fungal culture extracts (Table 1,  $p < 0.001$ ,  $p < 0.001$ ). Extracts from all fungal consortia

270 yielded an increase in total phenolics over individual cultures (Table 1). The Elata\_Pmin consortia  
271 produced significantly more phenolics than either Elata or Pmin alone (Table 1,  $p = 0.01$ ,  $p = 0.03$ ).  
272 For the Elata\_Pch consortia growth there was an averaging effect relative to phenolic production.  
273 Phenolic content when Elata and Pch were grown in combination was significantly lower than  
274 Pch alone ( $p < 0.001$ ), but it was significantly higher than Elata alone ( $p = 0.007$ ). The Pmin\_Pch  
275 combination showed an increase in overall phenolic production compared to that when the fungi  
276 were grown individually. The additive effect alone may be an important finding relative to Eutypa  
277 dieback and Esca.

278

279 Iron reduction was observed in all culture extracts. Elata and Pmin extracts both reduced  
280 approximately the same level of iron per mol of phenols (0.531 and 0.615mol iron/mol of  
281 phenolic). Pch extracts reduced more iron than the other two fungi per mol of phenolics (1.34mol  
282  $Fe^{2+}$ /mol of phenolic) reflecting the greater phenolic content (from the F-C results above). Pch  
283 extracts also displayed a greater level of reduction per mol of phenolic, reducing more than  
284 double the amount of iron compared to the extracts from Elata and Pmin in culture alone. The  
285 Elata\_Pmin combination showed a significantly increased level of iron reduction when compared  
286 to each fungus by itself ( $p < 0.001$ ,  $p = 0.001$ ) but the reduction level was not great enough to be  
287 considered an additive effect. The combination of Pch\_Pmin resulted in more limited total iron  
288 reduction when compared to the extracts from each of the fungi when grown separately and  
289 added together ( $p = 0.035$ ,  $p = 0.005$ ). Iron reduction in the Elata\_Pch combined fungal cultures  
290 was significantly greater than from Elata alone ( $p = 0.003$ ), and the reduction level was  
291 comparable to the Pch extracts when grown alone ( $p = 0.06$ ).

292

293 **H<sub>2</sub>O<sub>2</sub> production.** H<sub>2</sub>O<sub>2</sub> is required in the CMF reaction to react with ferrous iron. Although some  
294 enzymes are known to generate H<sub>2</sub>O<sub>2</sub>, enzymes are unable to penetrate intact plant cell walls  
295 (18, 29, 39-43), and a catalytic source of H<sub>2</sub>O<sub>2</sub> within the cell wall would promote a more efficient  
296 CMF reaction. Redox cycling of chelators with oxygen and transition metals in acidic pH  
297 environments is known to generate H<sub>2</sub>O<sub>2</sub> in solution, thus promoting the production of hydroxyl  
298 radicals (28), and we explored whether this mechanism might also be associated with the  
299 phenolic components from the three fungi.

300

301 Extracts from Elata and Pmin produced the highest levels of H<sub>2</sub>O<sub>2</sub> (690 and 800mmol H<sub>2</sub>O<sub>2</sub>/mol  
302 of phenols) as determined by the FOX assay (Table 1). While Pch and all combinations had  
303 detectable levels of H<sub>2</sub>O<sub>2</sub> generation, they were in the 0.4 to 9mmol range and significantly lower  
304 than both Elata and Pmin (Pch vs Elata: p = 0.006, Pch vs Pmin: p < 0.001, Elata vs Pch\_Elata: p =  
305 0.006, Pmin vs Pch\_Pmin: p = 0.005). Based on the results from the F-C and Ferrozine assay, it  
306 was expected that the Elata\_Pmin combination extract would show higher levels of H<sub>2</sub>O<sub>2</sub>  
307 production than Elata and Pmin extracts. However, H<sub>2</sub>O<sub>2</sub> production in extracts from this  
308 combination was below 10 mmol, and although still significantly higher than the Pch extract alone  
309 (p < 0.001) it was well below the 690 and 800mmol levels seen for the individual cultures of Elata  
310 and Pmin respectively. This may be due to the metabolite profile for the combined culture of  
311 Elata and Pmin being distinct from the individual cultures and lacking in the primary metabolites  
312 seen in the cultures when grown alone (See "Identification of LMW Metabolites" section below).

313 **TABLE 1** Total phenolic content (Folin-Ciocalteu) of LMW fungal extracts from the three GTD  
314 fungi, together with iron reduction (Ferrozine), and H<sub>2</sub>O<sub>2</sub> production (FOX) from those extracts.  
315 Results shown as mean ± SD, n = 3.

|            | <i>Total phenolic content</i><br>(mM) | Iron reduced (mol<br>Fe <sup>2+</sup> /mol of phenols) | H <sub>2</sub> O <sub>2</sub> produced (mmol<br>H <sub>2</sub> O <sub>2</sub> /per mol phenols) |
|------------|---------------------------------------|--------------------------------------------------------|-------------------------------------------------------------------------------------------------|
| Elata      | 1.03 ± 0.08                           | 0.531 ± 0.010                                          | 690 ± 70                                                                                        |
| Pmin       | 1.07 ± 0.10                           | 0.615 ± 0.013                                          | 800 ± 20                                                                                        |
| Pch        | 3.33 ± 0.36                           | 1.34 ± 0.08                                            | 1.6 ± 0.1                                                                                       |
| Elata_Pmin | 1.22 ± 0.107                          | 0.877 ± 0.026                                          | 8.8 ± 0.3                                                                                       |
| Elata_Pch  | 2.25 ± 0.25                           | 1.16 ± 0.05                                            | 1.7 ± 0.2                                                                                       |
| Pmin_Pch   | 4.05 ± 0.20                           | 1.62 ± 0.10                                            | 0.4 ± 0.1                                                                                       |

316

317

318 **Electron Paramagnetic Resonance (EPR).** A DMPO-HO<sup>•</sup> adduct with its characteristic 4-line  
319 spectrum allowed detection and quantification of HO<sup>•</sup> in solution (Fig. 2). All extracts were found  
320 to generate HO<sup>•</sup> when examined in the EPR studies for radical generation for pH values of both  
321 3.5 and 5.5. The production of HO<sup>•</sup> was considerably greater at pH 3.5 for most of the treatments  
322 tested. It should be noted that only cultures containing Pch reached pH 3-3.5 under the  
323 experimental conditions tested. Uniquely, all extracts produced more HO<sup>•</sup> than a reference  
324 catechol compound at the same concentration based on F-C analysis of phenolics. Catechol is  
325 typically used as a standard in iron-reduction assays because of its capacity for iron reduction  
326 (44).

327

328

329 **Identification of LMW metabolites.** Metabolite identification analysis of the three fungi in  
330 individual cultures (Fig. S2-S4) showed that several phenolic and non-phenolic compounds were  
331 present, with some of them previously reported as having iron reduction capacity (Table 2).  
332 Interestingly, all fungi produced small catecholates like 3,4-dihydroxybenzoic acid (Elata), caffeic  
333 acid (Pmin) and hydroxycinnamic acids like sinapinic acid (Pch, Pmin) and caffeic acid (Pmin).  
334 Catecholates and hydroxycinnamic acids chelate iron and are known for their ability to increase  
335 the production of ROS under appropriate conditions (44-46). In addition, Elata also produces  
336 pyochelin, a phenolic siderophore and iron reducing compound that is one of the primary  
337 siderophores isolated from *Pseudomonas spp.*; and terrein, a non-phenolic iron reducer also  
338 found in *Aspergillus terreus* with reported anticarcinogenic activity (47).

339  
340 MS analysis also identified other organic phenols, aldehydes, and carboxylic acids (Table 3)  
341 without previously reported iron reduction activity; however, some structures suggest that they  
342 could potentially chelate iron. Further experiments with individual model metabolites would be  
343 required to demonstrate this, however.

344  
345 **TABLE 2** Metabolites produced by *E. lata*, *P. minimum*, and *P. chlamydospora* with previously  
346 reported capacity for iron reduction.

| Compound                  | Formula                                                                      | Elata | Pmin | Pch | Ref  |
|---------------------------|------------------------------------------------------------------------------|-------|------|-----|------|
| Pyochelin                 | C <sub>14</sub> H <sub>16</sub> N <sub>2</sub> O <sub>3</sub> S <sub>2</sub> | ●     |      |     | (48) |
| 3,4-dihydroxybenzoic acid | C <sub>7</sub> H <sub>6</sub> O <sub>4</sub>                                 | ●     |      |     | (49) |
| Terrein                   | C <sub>8</sub> H <sub>10</sub> O <sub>3</sub>                                | ●     |      |     | (50) |
| Sinapic acid methyl ester | C <sub>12</sub> H <sub>14</sub> O <sub>5</sub>                               |       | ●    | ●   | (51) |
| Dihydroferulic acid       | C <sub>10</sub> H <sub>12</sub> O <sub>4</sub>                               |       |      | ●   | (52) |
| Caffeic acid              | C <sub>9</sub> H <sub>8</sub> O <sub>4</sub>                                 |       | ●    |     | (53) |



|                   |                                                |   |      |
|-------------------|------------------------------------------------|---|------|
| Gallic acid       | C <sub>7</sub> H <sub>6</sub> O <sub>5</sub>   | ● | (54) |
| Homogentisic acid | C <sub>8</sub> H <sub>8</sub> O <sub>4</sub>   | ● | (55) |
| Sinapinic acid    | C <sub>11</sub> H <sub>12</sub> O <sub>5</sub> | ● | (56) |

347

348

349 **TABLE 3** Mass Spectral analysis of phenolic, aldehydes, and carboxylic acid metabolites produced  
 350 by *E. lata*, *P. minimum*, and *P. chlamydospore* without reported iron reduction activity.

351

| Compound                                                                   | Formula                                        | Structure                                                                            | Elata | Pmin | Pch |
|----------------------------------------------------------------------------|------------------------------------------------|--------------------------------------------------------------------------------------|-------|------|-----|
| 3,4,5-trimethoxycinnamic acid                                              | C <sub>12</sub> H <sub>14</sub> O <sub>5</sub> | 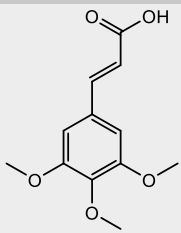    | ●     |      |     |
| Polygonolide                                                               | C <sub>12</sub> H <sub>12</sub> O <sub>4</sub> |    | ●     |      |     |
| 3,4',5-Biphenyltriol                                                       | C <sub>12</sub> H <sub>10</sub> O <sub>3</sub> |   | ●     |      |     |
| 4-hydroxy-3-(3-methylbut-2-enyl)benzoic acid                               | C <sub>12</sub> H <sub>14</sub> O <sub>3</sub> |  |       | ●    | ●   |
| 4,6,8-trihydroxy-7-methoxy-3-methyl-3,4-dihydroisochromen-1-one (Lignicol) | C <sub>11</sub> H <sub>12</sub> O <sub>6</sub> |  |       | ●    |     |
| 3-coumaric acid                                                            | C <sub>9</sub> H <sub>8</sub> O <sub>3</sub>   |   |       | ●    |     |

|                                                                          |                   |                                                                                    |  |  |   |
|--------------------------------------------------------------------------|-------------------|------------------------------------------------------------------------------------|--|--|---|
| Homovanillic acid                                                        | $C_9H_{10}O_4$    | 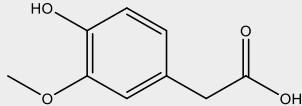 |  |  | ● |
| 3-Methoxybenzaldehyde                                                    | $C_8H_8O_2$       |  |  |  | ● |
| 1-(3-ethyl-2,4-dihydroxy-6-methoxyphenyl)butan-1-one<br>(Deoxyphomalone) | $C_{13}H_{18}O_4$ |  |  |  | ● |

352

353

354 Based on our findings from both the iron reduction and hydrogen peroxide production analyses,  
 355 we propose that some GTD fungi produce LMW metabolites that are responsible for iron  
 356 reduction, while other fungi produce LMW metabolites that play a greater role in hydrogen  
 357 peroxide/oxidant production (Table 1). The LMW extracts from Elata and Pmin possessed  
 358 relatively limited iron-reduction capacity but produced a significantly greater amount of  
 359 hydrogen peroxide than Pch. Extracts from the fungal consortia combinations possessed iron  
 360 reduction capability, but virtually no hydrogen peroxide was observed, including in the  
 361 combination Elata Pmin. Our MS analysis (Table 2) showed at least five metabolites with iron  
 362 reduction capacity were identified from Pmin; with Elata and Pch producing 3 and 2 iron reducing  
 363 metabolites, respectively. We suggest that individual fungi in GTD consortia produce LMW  
 364 metabolites with specialized and differential functions, with some species taking on greater roles  
 365 in the production of iron-reducing metabolites while other species produce metabolites with

366 greater capacity for peroxide generation. This may help to explain why GTD pathogenesis is often  
367 associated with a consortium of GTD fungi rather than individual fungi.

368

369 As detailed in the CMF mechanism for brown rot fungi (19), we proposed that H<sub>2</sub>O<sub>2</sub> reacts with  
370 reduced iron to allow targeted ROS generation such as hydroxyl radicals within plant/wood cell  
371 walls to initiate digestion of the lignocellulose components (as part of pathogenesis). In the case  
372 of *Eutypa dieback* and the *Esca* disease complex, for wood necrosis to occur by a similar  
373 mechanism these reactions would also need to occur in tissue that is maintained at a pH ≤ 5.5.  
374 This falls into the range of the natural pH of wood cell walls, and our results also show that a pH  
375 of ~5.5 was maintained by individual liquid cultures of *Pmin* and *Elata* throughout the growth  
376 period of 6 weeks (data not shown). However, in *Pch* cultures (grown either alone, or in  
377 combination with either *Pmin* or *Elata*) the pH dropped to 3-3.5. The reduction in pH by *Pch* may  
378 also help explain why different consortia fungi are required in GTD pathogenesis, as pH  
379 modification potentially changes the fungal/wood micro-environment to promote the select  
380 oxidative chemistries that we report here. Similar oxidative chemistries have also been observed  
381 with other catecholate fungal metabolites (19, 25). It has been demonstrated that acidic  
382 environments enhance iron reduction by phenolic compounds, and this is observed in our  
383 ferrozine assay results (Table 1) where extracts from *Pch* alone or in consortia reduced more iron  
384 than any other fungal extract produced from either individual fungi or consortia growth. The  
385 reduction in pH by *Pch* alone, or in consortia, supports the hypothesis that GTD fungal consortia  
386 are necessary for reduction of pH to promote iron reduction as a precursor to the generation of  
387 damaging hydroxyl radical generation. This, together with the differential promotion of CMF

388 chemistry by different fungal metabolites, is a novel concept relative to pathogenesis  
389 mechanisms associated with consortia fungal activity and grapevine trunk disease that has not  
390 previously been reported.

391

392 Further exploration of this mechanism could potentially open new alternatives for treatments to  
393 prevent or limit yield loss in vineyards. Fig. 3 summarizes our hypothesized mechanism for the  
394 initiation of the wood cell wall damage by GTD fungi through HO<sup>\*</sup> generation by LMW metabolite  
395 secretion. Lignin depolymerization via this LMW mechanism would promote lignocellulose cell  
396 wall damage to produce features of necrosis, and after the initiation of this degradation, would  
397 potentially allow extracellular fungal CAZymes to further depolymerize the wood cell wall. In later  
398 stages, as vine defenses are overwhelmed, the fungal LMW metabolites would also potentially  
399 be transported via the vascular system of the stem to promote further necrosis of cordon wood  
400 and ultimately leaf tissue with disease progression.

401

402

## 403 **CONCLUSIONS**

404

405 Our data indicates that some GTD fungi preferentially promote iron reduction in culture, while  
406 others boost H<sub>2</sub>O<sub>2</sub> production, suggesting that a mechanism similar to the CMF mechanism  
407 employed by brown rot fungi in wood biodegradation may also play a role in GTD pathogenesis.  
408 Since both iron reduction and H<sub>2</sub>O<sub>2</sub> production are required in CMF systems for generation of  
409 hydroxyl radicals, this may help to explain why GTDs are often caused by a consortium of fungi  
410 rather than individual species. Often these diseases are associated with what has been described

411 previously as non-causative fungi, but the role of LMW in GTD Eutypa and Esca pathogenesis has  
412 not been well explored. Our observation of differential function of extracellular LMW metabolites  
413 from GTD consortia fungi has not previously been reported, even in brown rot Basidiomycota  
414 species where the role of LMW metabolites in wood decay has been established. Thus, this is the  
415 first report of the differential action of LMW metabolites promoting the sequential steps of a  
416 mediated Fenton chemistry related to pathogenesis in grapevine tissue. We also observed that  
417 one fungus in the consortium promoted establishment of a lower pH environment. Pch reduced  
418 the pH of the media to 3-4 when grown alone in cultures, but also in consortia with either Elata  
419 or Pmin. This pH promotes iron reduction by catecholates, and our observation that Pch reduces  
420 pH of the media, while Elata/Pmin maintain pH constant (5.5), may also help to explain why  
421 fungal consortia growth is required in many GTDs. Additional research must be conducted to  
422 isolate individual LMW metabolites to determine their specific role in GTD fungal consortia ;  
423 however, our MS analysis has already identified select metabolites from each of the three fungal  
424 species studied which have previously been reported to possess iron-reduction capability. Future  
425 research will assess whether these specific LMW metabolites also aid in promoting CMF  
426 chemistry and the generation of hydroxyl radicals as a component of pathogenesis.

427

428

## 429 **ACKNOWLEDGMENTS**

430

431 The authors would like to thank Prof. Akif Eskalen and Dr. Karina Delfar of the Department of  
432 Plant Pathology of the University of California, Davis for providing cultures of *Phaeomonilla*

433 *chalmydospora*, *Phaeacremonium minimum* and *Eutypa lata* used in this study. We appreciate  
434 the support of Professor Kevin Kittilstved from the Department of Chemistry at the University of  
435 Massachusetts, Amherst, in allowing the use of their EPR facilities. Mass Spectral analysis was  
436 conducted by Creative biolabs (Shirley, NY).

437 This research was supported by the National Institute of Food and Agriculture (Multistate Hatch  
438 Research Project S1075 1020436-MAS00503), U.S. Department of Agriculture, the Center for  
439 Agriculture, Food and the Environment, and the Microbiology Department, University of  
440 Massachusetts Amherst. The contents are solely the responsibility of the authors and do not  
441 necessarily represent the official views of the USDA or NIFA. The authors also thank the American  
442 Vineyard Foundation (project 2019-2275) for their support.

## 443 **AUTHOR CONTRIBUTIONS**

444  
445 Conceptualization, Barry Goodell; Methodology, Dana Sebestyen, Gabriel Perez-Gonzalez and  
446 Barry Goodell; Validation, Barry Goodell; Formal Analysis, Dana Sebestyen, Gabriel Perez-  
447 Gonzalez, Norman Lee; Investigation, Dana Sebestyen and Gabriel Perez-Gonzalez.; Resources,  
448 Barry Goodell and Christophe Bertsch.; Writing – Original Draft Preparation, Dana Sebestyen and  
449 Gabriel Perez-Gonzalez; Writing – Review & Editing, Dana Sebestyen, Gabriel Perez-Gonzalez,  
450 Elsa Petit, Jody Jellison, Laura Mugnai, Christophe Bertsch, Sibylle Farine, Eric Gelhaye, and Barry  
451 Goodell; Visualization, Barry Goodell, Dana Sebestyen and Gabriel Perez-Gonzalez; Supervision,  
452 Barry Goodell, Gabriel Perez-Gonzalez, Jody Jellison, Elsa Petit; Project Administration, Barry  
453 Goodell.; Funding Acquisition, Barry Goodell.

454

## 455 REFERENCES

456

- 457 1. Surico G, Mugnai L, Marchi G. Older and more recent observations on esca: a critical overview.  
458 *Phytopathologia Mediterranea* 2006;45:S68-S86.
- 459 2. Bertsch C, Larignon P, Farine S, Clément C, Fontaine F. The Spread of Grapevine Trunk Disease.  
460 *Science*. 2009;324:721-.
- 461 3. Bertsch C. Grapevine trunk diseases: complex and still poorly understood. *Plant Pathology*  
462 2013;62:243-65.
- 463 4. Labois C, Wilhelm K, Laloue H, Tarnus C, Bertsch C, Goddard M-L, et al. Wood Metabolomic  
464 Responses of Wild and Cultivated Grapevine to Infection with *Neofusicoccum parvum*, a Trunk Disease  
465 Pathogen. *Metabolites*. 2020;10(6):232.
- 466 5. Mondello V, Songy A, Battiston E, Pinto C, Coppin C, Trotel-Aziz P, et al. Grapevine Trunk  
467 Diseases: A Review of Fifteen Years of Trials for Their Control with Chemicals and Biocontrol Agents.  
468 *Plant Disease*. 2018;102(7):1189-217.
- 469 6. Berraf-Tebbal A, Bouznad Z, Santos JM, Coelho M, Peros JP, Phillips AJL. *Phaeoacremonium*  
470 species associated with *Eutypa dieback* and esca of Grapevines in Algeria. *Phytopathologia*  
471 *Mediterranea*. 2011;50 86-97.
- 472 7. Rolshausen PE, Baumgartner K, Travadon R, Fujiyoshi P, Pouzoulet J, Wilcox WF. Identification of  
473 *Eutypa* spp. Causing *Eutypa Dieback* of Grapevine in Eastern North America. *Plant Disease*.  
474 2013;98(4):483-91.
- 475 8. Morales-Cruz A, Figueroa-Balderas R, García JF, Tran E, Rolshausen PE, Baumgartner K, et al.  
476 Profiling grapevine trunk pathogens in planta: a case for community-targeted DNA metabarcoding. *BMC*  
477 *Microbiology*. 2018;18(1):214.
- 478 9. Bruez E, Lecomte P, Grosman J, Doublet B, Bertsch C, Fontaine F, et al. Overview of grapevine  
479 trunk diseases in France in the 2000s *Phytopathologia Mediterranea*. 2013;52(2):262-75.
- 480 10. Fontaine F. Grapevine Trunk Diseases: A Review. International Organization of Vine and Wine  
481 Intergovernmental Organization. 2016.
- 482 11. Siebert J. *Eutypa*: The economic toll on vineyards. *Wines Vines* April 2001:50-6.
- 483 12. Hofstetter v, Buyck B, Croll D, Viret O, Couloux A, Gindro K. What if esca disease of grapevine  
484 were not a fungal disease? *Fungal Diversity*. 2012;54:51-67.
- 485 13. Tey-Rulh P, Philippe I, Renaud J-M, Tsoupras G, de Angelis P, Fallot J, et al. Eutypine, a  
486 phytotoxin produced by *Eutypa lata* the causal agent of dying-arm disease of grapevine. *Phytochemistry*.  
487 1991;30(2):471-3.
- 488 14. Claverie M, Notaro M, Fontaine F, Wery J. Current knowledge of Grapevine Trunk Diseases with  
489 complex etiology: a systemic approach. *Phytopathologia Mediterranea*. 2020;59(1):29-53.
- 490 15. Xu G, Goodell B. Mechanisms of wood degradation by brown-rot fungi: chelator-mediated  
491 cellulose degradation and binding of iron by cellulose. *Journal of Biotechnology*. 2001;87(1):43-57.
- 492 16. Goodell B. Brown-Rot Fungal Degradation of Wood: Our Evolving View. *Wood Deterioration and*  
493 *Preservation*. 2003;845:97-118.
- 494 17. Goodell B, Qian Y, Jellison J. Fungal Decay of Wood: Soft Rot-Brown Rot-White Rot.  
495 *Development of Commercial Wood Preservatives*. 2008;982.
- 496 18. Arantes V, Jellison J, Goodell B. Peculiarities of brown-rot fungi and biochemical Fenton reaction  
497 with regard to their potential as a model for bioprocessing biomass. *Applied Microbiology and*  
498 *Biotechnology* 2012;94:323-38.
- 499 19. Goodell B. Fungi Involved in the Biodeterioration and Bioconversion of Lignocellulose  
500 Substrates. In: Benz JP, Schipper K, editors. *Genetics and Biotechnology*. . 2. *The Mycota* (A

- 501 Comprehensive Treatise on Fungi as Experimental Systems for Basic and Applied Research) Chapter  
502 15.: Springer, Cham; 2020. p. 369-97.
- 503 20. Hess J, Balasundaram SV, Bakkemo RI, Drula E, Henrissat B, Högberg N, et al. Niche  
504 differentiation and evolution of the wood decay machinery in the invasive fungus *Serpula lacrymans*.  
505 The ISME Journal DOI 101038/s41396-020-00799-5. 2020.
- 506 21. Kent MS, Zeng J, Rader N, Avina IC, Simoes CT, Brenden CK, et al. Efficient conversion of lignin  
507 into a water-soluble polymer by a chelator-mediated Fenton reaction: optimization of H<sub>2</sub>O<sub>2</sub> use and  
508 performance as a dispersant. *Green Chemistry*. 2018;20(13):3024-37.
- 509 22. Goodell B, Zhu Y, Kim S, Kafle K, Eastwood D, Daniel G, et al. Modification of the nanostructure  
510 of lignocellulose cell walls via a non-enzymatic lignocellulose deconstruction system in brown rot wood-  
511 decay fungi. *Biotechnology for Biofuels*. 2017;10.
- 512 23. Rolshausen PE, Greve LC, Labavitch JM, Mahoney NE, Molyneux RJ, Gubler WD. Pathogenesis of  
513 *Eutypa lata* in Grapevine: Identification of Virulence Factors and Biochemical Characterization of Cordon  
514 Dieback. *Phytopathology*®. 2008;98(2):222-9.
- 515 24. Osti F, Di Marco S. Iron-dependent, non-enzymatic processes promoted by *Phaeoconiella*  
516 *chlamydospora* and *Phaeoacremonium aleophilum*, agents of esca in grapevine. *Physiological and*  
517 *Molecular Plant Pathology*. 2010;74:309-16.
- 518 25. Goodell B. Low molecular weight chelators and phenolic compounds isolated from wood  
519 decay fungi and their role in the fungal biodegradation of wood. *Journal of Biotechnology*. 1997;53:133-  
520 62.
- 521 26. Contreras D, Rodríguez J, Freer J, Schwederski B, Kaim W. Enhanced hydroxyl radical production  
522 by dihydroxybenzene-driven Fenton reactions: implications for wood biodegradation. *JBIC Journal of*  
523 *Biological Inorganic Chemistry*. 2007;12(7):1055-61.
- 524 27. Varela E, M T. Effect of pH and oxalate on hydroquinone-derived hydroxyl radical formation  
525 during brown rot wood degradation. *Applied and Environmental Microbiology*. 2003;69(10):6025-31.
- 526 28. Akagawa M, Shigemitsu T, Suyama K. Production of Hydrogen Peroxide by Polyphenols and  
527 Polyphenol-rich Beverages under Quasi-physiological Conditions. *Bioscience, Biotechnology, and*  
528 *Biochemistry*. 2003;67(12):2632-40.
- 529 29. Zhu Y, Liu J, Wang C, Goodell B, Esker A. Chelator-mediated biomimetic degradation of cellulose  
530 and chitin. *International Journal of Biological Macromolecules*. 2020;153:433-40.
- 531 30. Mahoney N, Lardner R, Molyneux R, Scott E, Smith L, Schoch T. Phenolic and heterocyclic  
532 metabolite profiles of the grapevine pathogen *Eutypa lata*. *Phytochemistry*. 2003;64(2):475-84.
- 533 31. Molyneux R, Mahoney N, Bayman P, Wong R, Meyer K, Irelan N. *Eutypa* Dieback in Grapevines:  
534 Differential Production of Acetylenic Phenol Metabolites by Strains of *Eutypa lata*. *Journal of Agricultural*  
535 *and Food Chemistry*. 2002;50(6):1393-9.
- 536 32. Andolfi A, Mugnai L, Luque J, Surico G, Cimmino A, Evidente A. Phytotoxins Produced by Fungi  
537 Associated with Grapevine Trunk Diseases. *Toxins*. 2011;3(12):1569-605.
- 538 33. Jellison J, Chandhoke V, Goodell B, Fekete FA. The isolation and immunolocalization of iron-  
539 binding compounds produced by *Gloeophyllum trabeum*. *Applied Microbiology and Biotechnology*.  
540 1991;35:805-9.
- 541 34. Highley T. Influence of carbon source on cellulase activity of white-rot and brown-rot fungi.  
542 *Wood and Fiber*. 1973;5(1).
- 543 35. Singleton V, Orthofer R, Lamueala-Raventos R. Analysis of total phenols and other oxidation  
544 substrates and antioxidants by means of folin-ciocalteu reagent. *Methods in Enzymology*. 1999;299:152-  
545 78.
- 546 36. Pierson EE, Clark RB. Ferrous Iron Determination in Plant Tissue. *Journal of Plant Nutrition*.  
547 1984;7:107-16.



- 548 37. Wolff S. Ferrous ion oxidation in presence of ferric ion indicator xylenol orange for  
549 measurement of hydroperoxides. *Methods in Enzymology*. 1994;233:182-9.
- 550 38. Rhee SG, Chang T-S, Jeong W, Kang D. Methods for Detection and Measurement of Hydrogen  
551 Peroxide Inside and Outside of Cells. *Molecules and Cells*. 2010;29:539-49.
- 552 39. Goodell Bea. Modification of the nanostructure of lignocellulose cell walls via a non-enzymatic  
553 lignocellulose deconstruction system in brown rot wood-decay fungi. *Biotechnology for Biofuels*  
554 2017;10.
- 555 40. Tepfer M, Taylor IEP. The interaction of divalent cations with pectic substances and their  
556 influence on acid-induced cell wall loosening. *Canadian Journal of Botany*. 1981;59(8):1522-5.
- 557 41. Flournoy DS, Kirk TK, Highley TL. Wood decay by brown-rot fungi : changes in pore structure and  
558 cell wall volume. *Holzforschung*. 1991;45:383-8.
- 559 42. Kleman-Leyer K, Agosin E, Conner AH, Kirk TK. Changes in Molecular Size Distribution of  
560 Cellulose during Attack by White Rot and Brown Rot Fungi. *Applied and Environmental Microbiology*.  
561 1992;58(4):1266-70.
- 562 43. Cragg SM, Beckham GT, Bruce NC, Bugg TDH, Distel DL, Dupree P, et al. Lignocellulose  
563 degradation mechanisms across the Tree of Life. *Current Opinion in Chemical Biology*. 2015;29:108-19.
- 564 44. Tamaru Y, Yoshida M, D. Eltis L, Goodell B. Multiple iron reduction by methoxylated phenolic  
565 lignin structures and the generation of reactive oxygen species by lignocellulose surfaces. *International*  
566 *Journal of Biological Macromolecules*. 2019;128:340-6.
- 567 45. Maurya DK, Devasagayam TPA. Antioxidant and prooxidant nature of hydroxycinnamic acid  
568 derivatives ferulic and caffeic acids. *Food and Chemical Toxicology*. 2010;48(12):3369-73.
- 569 46. Salgado P, Melin V, Contreras D, Moreno Y, Mansilla HD. Fenton reaction driven by iron ligands.  
570 *Journal of the Chilean Chemical Society*. 2013;58:2096-101.
- 571 47. Asfour HZ, Awan ZA, Bagalagel AA, Elfaky MA, Abdelhameed RFA, Elhady SS. Large-Scale  
572 Production of Bioactive Terrein by *Aspergillus terreus* Strain S020 Isolated from the Saudi Coast of the  
573 Red Sea. *Biomolecules*. 2019;9(9):480.
- 574 48. Coffman TJ, Cox CD, Edeker BL, Britigan BE. Possible role of bacterial siderophores in  
575 inflammation. Iron bound to the *Pseudomonas* siderophore pyochelin can function as a hydroxyl radical  
576 catalyst. *The Journal of Clinical Investigation*. 1990;86(4):1030-7.
- 577 49. Spiegel M, Kapusta K, Kołodziejczyk W, Saloni J, Żbikowska B, Hill GA, et al. Antioxidant Activity  
578 of Selected Phenolic Acids-Ferric Reducing Antioxidant Power Assay and QSAR Analysis of the Structural  
579 Features. *Molecules (Basel, Switzerland)*. 2020;25(13):3088.
- 580 50. Gressler M, Meyer F, Heine D, Hortschansky P, Hertweck C, Brock M. Phytotoxin production in  
581 *Aspergillus terreus* is regulated by independent environmental signals. *Biochemistry and Chemical*  
582 *Biology, Microbiology and Infectious diseases*. 2015.
- 583 51. Siger A, Czubinski J, Dwiecki K, Kachlicki P, Nogala-Kalucka M. Identification and antioxidant  
584 activity of sinapic acid derivatives in *Brassica napus* L. seed meal extracts. *European Journal of Lipid*  
585 *Science and Technology*. 2013;115(10):1130-8.
- 586 52. Chen H, Virk MS, Chen F. Phenolic acids inhibit the formation of advanced glycation end  
587 products in food simulation systems depending on their reducing powers and structures. *International*  
588 *Journal of Food Sciences and Nutrition*. 2016;67(4):400-11.
- 589 53. Gülçin İ. Antioxidant activity of caffeic acid (3,4-dihydroxycinnamic acid). *Toxicology*.  
590 2006;217(2):213-20.
- 591 54. Powell H, Taylor M. Interactions of iron(II) and iron(III) with gallic acid and its homologues: a  
592 potentiometric and spectrophotometric study. *Australian Journal of Chemistry*. 1982;35(4):739-56.
- 593 55. Martin JP, Batkoff B. Homogentisic acid autoxidation and oxygen radical generation: implications  
594 for the etiology of alkaptonuric arthritis. *Free Radical Biology and Medicine*. 1987;3(4):241-50.

595 56. Hynes MJ, O'Coinceanainn Mn. The kinetics and mechanisms of reactions of iron(III) with caffeic  
596 acid, chlorogenic acid, sinapic acid, ferulic acid and naringin. *Journal of Inorganic Biochemistry*.  
597 2004;98(8):1457-64.

598

599

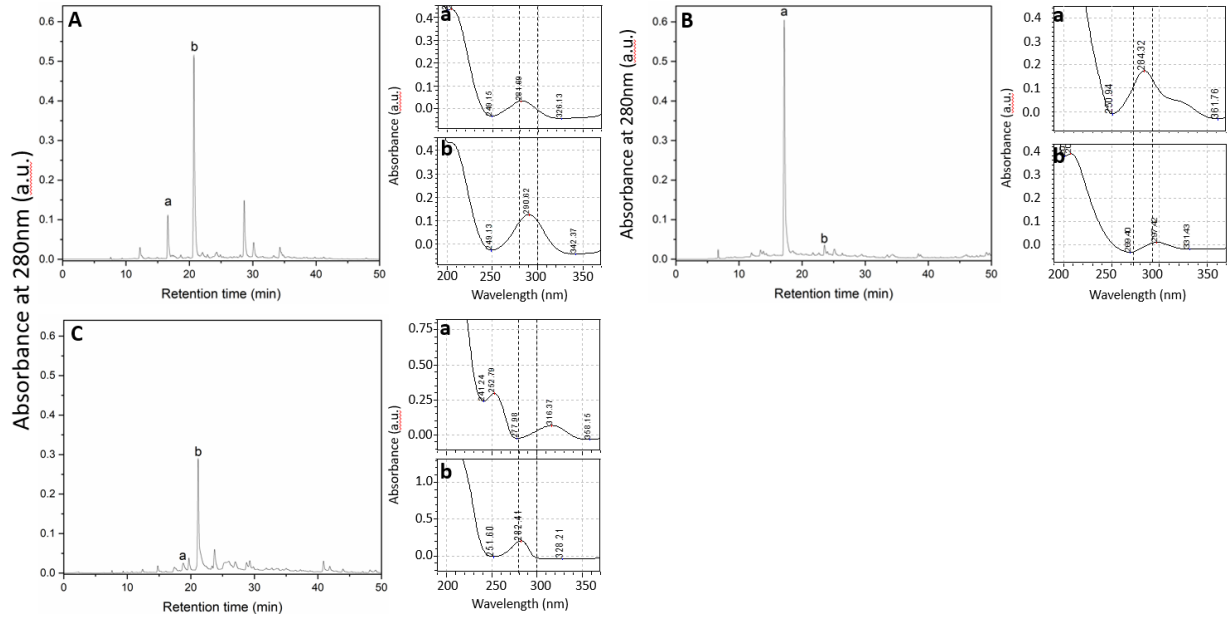

600

601 **FIG 1** HPLC chromatograms (Left for each sample) of (A) Elata, (B) Pmin, and (C) Pch fungal  
 602 metabolite extracts taken at 280nm. Labels (a,b) indicate the putative phenolic peaks selected  
 603 (abs. ~280nm). (Right) UV spectra of the two most abundant extract peaks.

604

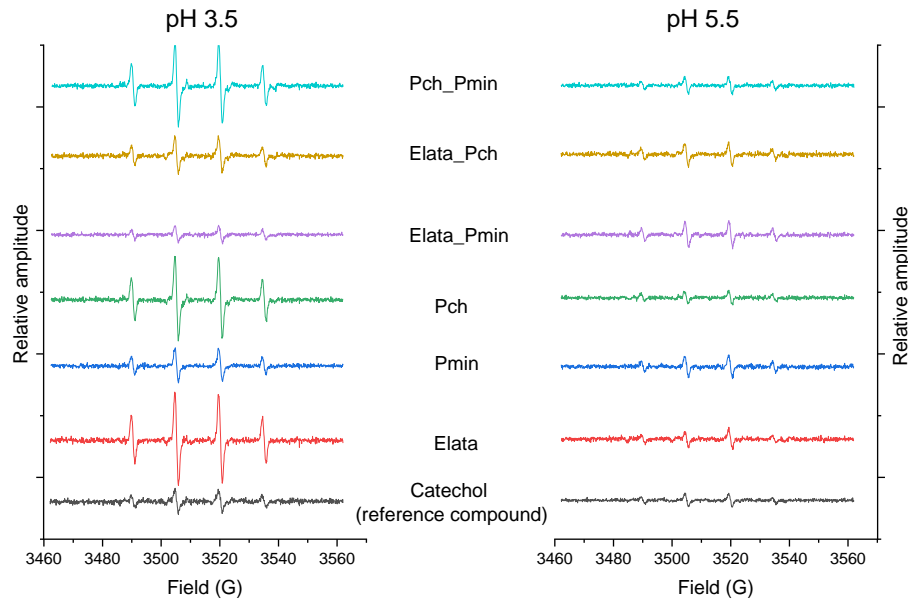

605

606 **FIG 2** Electron paramagnetic resonance (EPR) spectra of GTD fungal extracts spiked with DMPO  
 607 to detect hydroxyl radicals. The relative amplitude of each 4-peak spectra reflects the amount of  
 608 hydroxyl radical produced relative to a catechol standard. Fungi were grown alone, and in  
 609 consortia, to produce the extracts analyzed in this work.

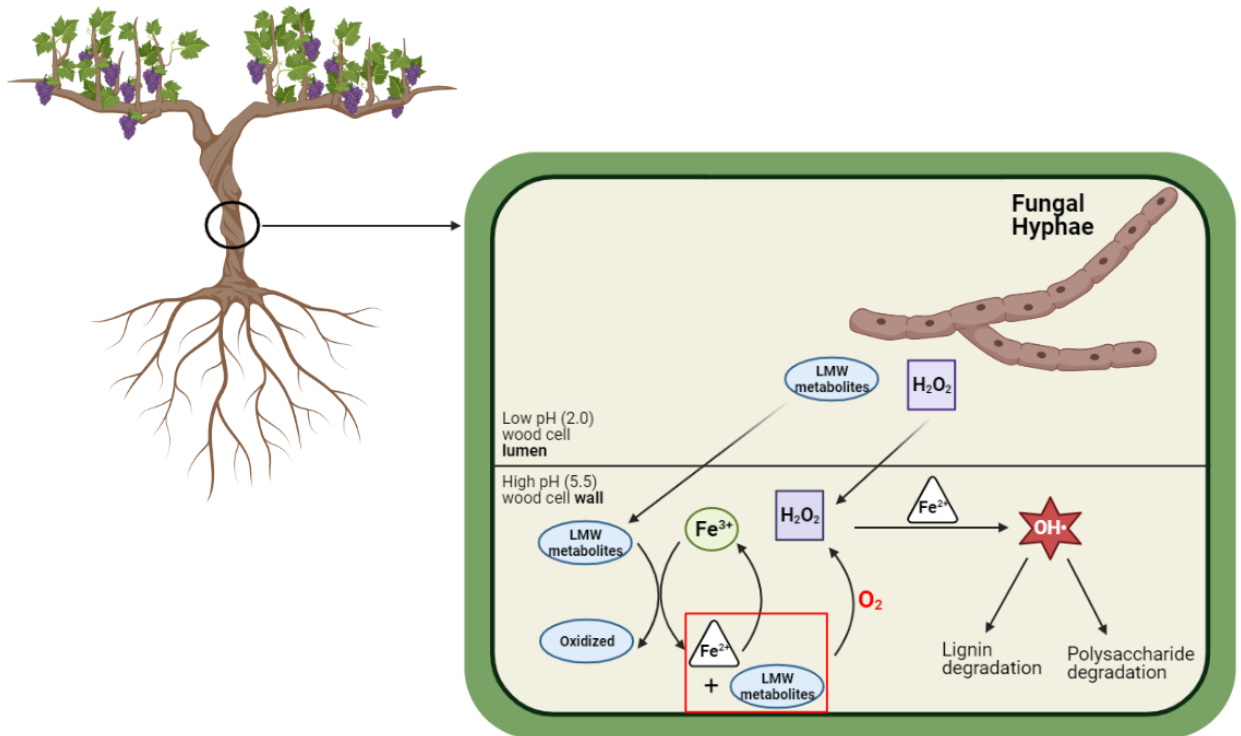

610

611 **FIG 3** Mechanism for the in-situ generation of  $\text{Fe}^{2+}$  and  $\text{H}_2\text{O}_2$ , and degradation of lignin and cell  
612 wall macromolecules by GTD fungi. LMW metabolites and  $\text{H}_2\text{O}_2$  diffuse into the cell wall, where  
613 the LMW metabolites sequester  $\text{Fe}^{3+}$  from the cell wall environment and reduce  $\text{Fe}^{3+}$  to  $\text{Fe}^{2+}$ .  
614 Through the mediated Fenton reaction,  $\text{Fe}^{2+}$  and  $\text{H}_2\text{O}_2$  react and generate hydroxyl radicals ( $\text{OH}^\bullet$ ).  
615 Images built using Biorender software. Schematic modified from (29).

616
